# Supplementary material for: Isolation, identification, and pathological effects of beach sand bacterial extract on human skin keratinocytes in vitro
Source: PeerJ. 2018 Jan 12;6:e4245. doi: 10.7717/peerj.4245 (PMC5807979; doi:10.7717/peerj.4245)
Supplement: Supplemental Information 1 [file peerj-06-4245-s001.xlsx]

## Sheet: Sheet1
SUNRISE; Serial number: 604000083; Firmware: V 3.31 25/08/05; XFLUOR4 Version: V 4.51
Date:					2016-05-11
Time:					10:32:39
Measurement mode:					Absorbance
Measurement wavelength:					450	nm
Reference wavelength:					620	nm
Read mode:					Normal
Shake duration (Inside Normal):					5	s
Dual wave data (difference)
<>	1	2	3	4	5	6	7	8	9	10	11	12
A	1.901	0.406	1.781	0.273	1.427	0.292	0	-0.001	0.001	0.001	0.001	0.001
B	1.964	0.487	1.495	0.345	1.202	0.303	0.001	-0.001	0.001	0.001	0	0.001
C	1.901	0.406	1.781	0.273	1.427	0.292	0	0	0.001	0.001	0.001	0
D	0.095	0.124	0.129	0.138	0.136	0.141	0.001	-0.001	0.001	0.001	0.001	0.001
E	0.103	0.127	0.138	0.14	0.138	0.141	0.001	-0.001	0.002	0.001	0.001	0.001
F	0.101	0.124	0.129	0.135	0.133	0.134	0	-0.001	0.001	0.001	0	0.001
G	0.001	0	0.001	0.001	0.001	0.001	0	0	0.001	0.001	0	0.001
H	0.001	0	0	0	0.003	0.001	0.001	-0.001	0.002	0.001	0.001	0.001
	contro	100 ng/ml	control	300 ng/ml	control	500 ng/ml
ave	1.922	0.433	1.68567	0.297	1.352	0.295667
%	100		100		100
std	0.727461	0.935307	3.30244	0.831384	2.59808	0.127017
		Contro	Drug	STD	T test
	Control/100 ng	100	22.5286
	Control/300 ng	100	17.6191
	Control/500 ng	100	21.8688
			std
	Contrl	100	3.63731
	100	22.5286	4.67654
	300	17.6191	4.15692
	500 (ng/ml)	21.8688	0.635085
